# Supplementary material
Source: Springer Nature journal article supplement (https://www.springermedizin.de/resource/supplementary/12955_2014_1323_MOESM3_ESM.pdf/9559560)

**Scree Plot**

**Eigenvalue**

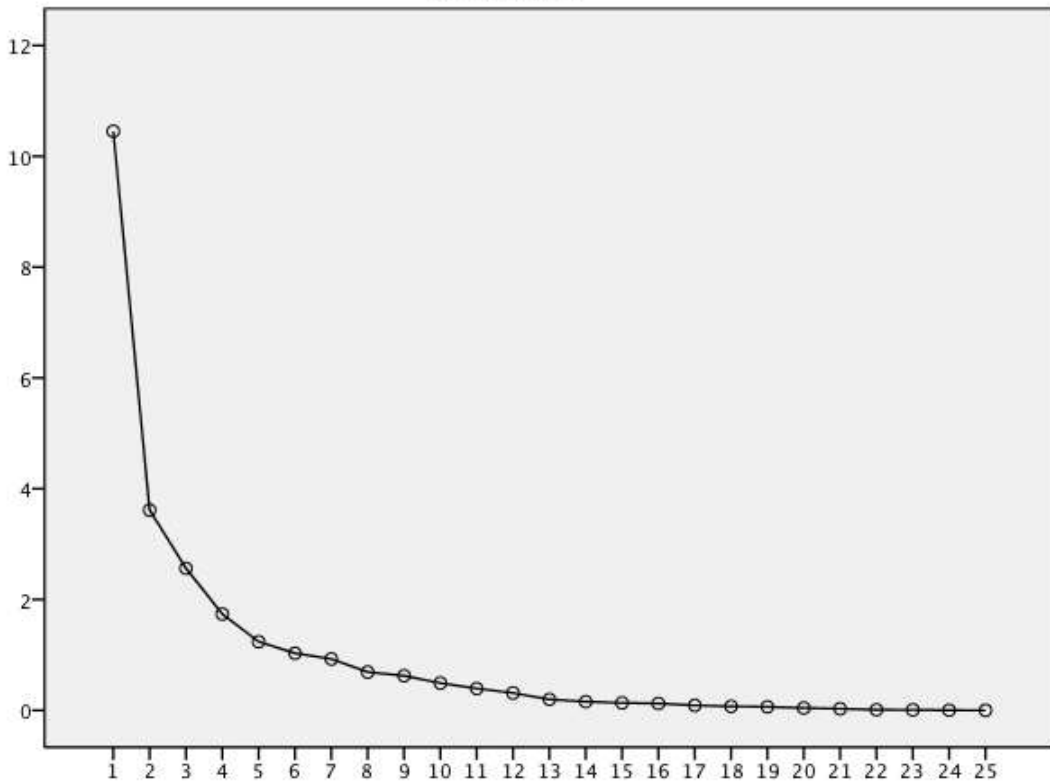

**Component Number**

Supplement: MOESM3 [file 9559560]
